# Supplementary material for: Delays in Coccidioidomycosis Diagnosis and Relationship to Healthcare Utilization, Phoenix, Arizona, USA1
Source: PubMed Central journal article supplement (PMC6711213; doi:10.3201/eid2509.190019), 2019-09
Supplement: 19-0019-Techapp-s1.pdf [file 19-0019-Techapp-s1.pdf]

# Delays in Coccidioidomycosis Diagnosis and Relationship to Healthcare Utilization, Arizona, USA

## Appendix

**Appendix Table.** Expanded ICD-9 code list used to define the initial presentation date in study of delays in coccidioidomycosis diagnosis.

| ICD-9 code | Diagnosis                                                        | Phase I symptoms* | Phase II expansion† | No. initial symptoms‡ | No. total symptoms§ |
|------------|------------------------------------------------------------------|-------------------|---------------------|-----------------------|---------------------|
| 780.79     | Malaise and fatigue                                              | Yes               | Yes                 | 29                    | 61                  |
| 786.2      | Cough                                                            | Yes               | Yes                 | 27                    | 86                  |
| 486        | Pneumonia                                                        | No                | Yes                 | 10                    | 43                  |
| 493.90     | Unspecified asthma, uncomplicated                                | No                | Yes                 | 8                     | 13                  |
| 692.9      | Unspecified contact dermatitis, unspecified cause                | No                | Yes                 | 7                     | 11                  |
| 782.1      | Rash and nonspecific skin eruption                               | Yes               | Yes                 | 7                     | 13                  |
| 465.9      | Acute upper respiratory infection, unspecified                   | No                | Yes                 | 6                     | 9                   |
| 477.9      | Allergic rhinitis, unspecified                                   | No                | Yes                 | 5                     | 11                  |
| 724.2      | Low back pain                                                    | No                | Yes                 | 5                     | 6                   |
| 782.3      | Edema, unspecified                                               | No                | Yes                 | 5                     | 19                  |
| V79.0      | Encounter for screening for other disorder                       | No                | Yes                 | 4                     | 4                   |
| 461.9      | Acute sinusitis, unspecified                                     | No                | Yes                 | 3                     | 7                   |
| 473.9      | Unspecified sinusitis (chronic)                                  | Yes               | Yes                 | 3                     | 3                   |
| 719.41     | Pain in unspecified shoulder                                     | No                | Yes                 | 3                     | 8                   |
| 780.60     | Fever, unspecified                                               | Yes               | Yes                 | 3                     | 10                  |
| 784.0      | Headache (facial pain)                                           | Yes               | Yes                 | 3                     | 6                   |
| 786.50     | Unspecified chest pain                                           | Yes               | Yes                 | 3                     | 12                  |
| 079.99     | Other viral agents as the cause of diseases classified elsewhere | No                | Yes                 | 2                     | 3                   |
| 415.19     | Other pulmonary embolism without acute cor pulmonale             | No                | Yes                 | 2                     | 18                  |
| 462        | Acute pharyngitis                                                | Yes               | Yes                 | 2                     | 4                   |
| 466.0      | Bronchitis                                                       | No                | Yes                 | 2                     | 8                   |
| 490        | Bronchitis                                                       | No                | Yes                 | 2                     | 5                   |
| 496        | Chronic obstructive pulmonary disease, unspecified               | No                | Yes                 | 2                     | 7                   |
| 708.9      | Urticaria, unspecified                                           | No                | Yes                 | 2                     | 4                   |
| 714.9      | Inflammatory polyarthropathy                                     | No                | Yes                 | 2                     | 7                   |
| 719.00     | Effusion, unspecified joint                                      | Yes               | Yes                 | 2                     | 3                   |
| 719.40     | Pain in unspecified joint                                        | Yes               | Yes                 | 2                     | 4                   |
| 719.43     | Pain in unspecified wrist                                        | No                | Yes                 | 2                     | 3                   |
| 719.47     | Pain in unspecified ankle and joints of unspecified foot         | No                | Yes                 | 2                     | 3                   |
| 719.49     | Pain in unspecified joint                                        | No                | Yes                 | 2                     | 5                   |
| 722.4      | Other cervical disc degeneration, unspecified cervical region    | No                | Yes                 | 2                     | 6                   |
| 724.5      | Dorsalgia, unspecified                                           | No                | Yes                 | 2                     | 4                   |
| 729.1      | Myositis, unspecified                                            | No                | Yes                 | 2                     | 6                   |
| 733.90     | Disorder of bone, unspecified                                    | No                | Yes                 | 2                     | 6                   |
| 780.4      | Dizziness and giddiness                                          | No                | Yes                 | 2                     | 3                   |
| 786.05     | Shortness of breath                                              | No                | Yes                 | 2                     | 13                  |
| 786.52     | Chest pain on breathing                                          | No                | Yes                 | 2                     | 2                   |
| 786.59     | Chest pain                                                       | Yes               | Yes                 | 2                     | 4                   |
| V12.09     | Personal history of other infectious and parasitic diseases      | No                | Yes                 | 2                     | 3                   |
| 288.60     | Elevated leukocyte count, unspecified                            | No                | Yes                 | 1                     | 2                   |
| 382.9      | Otitis media, unspecified, unspecified ear                       | No                | Yes                 | 1                     | 1                   |

| ICD-9 code | Diagnosis                                                                     | Phase I symptoms* | Phase II expansion† | No. initial symptoms‡ | No. total symptoms§ |
|------------|-------------------------------------------------------------------------------|-------------------|---------------------|-----------------------|---------------------|
| 461.0      | Acute maxillary sinusitis, unspecified                                        | No                | Yes                 | 1                     | 3                   |
| 461.8      | Acute pansinusitis, unspecified                                               | No                | Yes                 | 1                     | 1                   |
| 477.8      | Other allergic rhinitis                                                       | No                | Yes                 | 1                     | 3                   |
| 482.89     | Pneumonia                                                                     | No                | Yes                 | 1                     | 2                   |
| 511.0      | Pleural condition, unspecified                                                | No                | Yes                 | 1                     | 3                   |
| 518.89     | Other diseases of lung                                                        | Yes               | Yes                 | 1                     | 3                   |
| 695.2      | Erythema nodosum                                                              | No                | Yes                 | 1                     | 6                   |
| 698.9      | Pruritus, unspecified                                                         | No                | Yes                 | 1                     | 1                   |
| 709.9      | Disorder of the skin and subcutaneous tissue, unspecified                     | No                | Yes                 | 1                     | 6                   |
| 719.07     | Effusion, unspecified ankle                                                   | No                | Yes                 | 1                     | 2                   |
| 719.42     | Pain in unspecified elbow                                                     | No                | Yes                 | 1                     | 1                   |
| 719.46     | Pain in unspecified knee                                                      | No                | Yes                 | 1                     | 2                   |
| 722.93     | Discitis, unspecified, lumbosacral region                                     | No                | Yes                 | 1                     | 1                   |
| 723.1      | Cervicalgia                                                                   | No                | Yes                 | 1                     | 2                   |
| 729.5      | Pain in unspecified limb                                                      | No                | Yes                 | 1                     | 7                   |
| 733.6      | Chondrocostal junction syndrome [Tietze]                                      | No                | Yes                 | 1                     | 5                   |
| 739.2      | Segmental and somatic dysfunction of thoracic region                          | No                | Yes                 | 1                     | 2                   |
| 780.99     | Other general symptoms and signs                                              | No                | Yes                 | 1                     | 2                   |
| 782.2      | Localized swelling, mass and lump, unspecified                                | No                | Yes                 | 1                     | 3                   |
| 785.6      | Enlarged lymph nodes, unspecified                                             | No                | Yes                 | 1                     | 5                   |
| 786.07     | Wheezing                                                                      | No                | Yes                 | 1                     | 1                   |
| 786.09     | Dyspnea and respiratory abnormality                                           | Yes               | Yes                 | 1                     | 5                   |
| 995.3      | Allergy, unspecified, initial encounter                                       | No                | Yes                 | 1                     | 1                   |
| V74.1      | Encounter for screening for respiratory tuberculosis                          | No                | Yes                 | 1                     | 4                   |
| 057.9      | Unspecified viral infection characterized by skin and mucous membrane lesions | No                | Yes                 | 0                     | 1                   |
| 288.3      | Eosinophilia                                                                  | Yes               | No                  | 0                     | 0                   |
| 289.3      | Nonspecific lymphadenitis, unspecified                                        | No                | Yes                 | 0                     | 1                   |
| 307.81     | Tension-type headache, unspecified, not intractable                           | No                | Yes                 | 0                     | 1                   |
| 478.19     | Other specified disorders of nose and nasal sinuses                           | No                | Yes                 | 0                     | 2                   |
| 478.70     | Other diseases of larynx                                                      | No                | Yes                 | 0                     | 3                   |
| 480.0      | Pneumonia                                                                     | No                | No                  | 0                     | 0                   |
| 480.1      | Pneumonia                                                                     | No                | No                  | 0                     | 0                   |
| 480.2      | Pneumonia                                                                     | No                | No                  | 0                     | 0                   |
| 480.3      | Pneumonia                                                                     | No                | No                  | 0                     | 0                   |
| 480.8      | Pneumonia                                                                     | No                | No                  | 0                     | 0                   |
| 481        | Pneumonia                                                                     | No                | No                  | 0                     | 0                   |
| 482.0      | Pneumonia                                                                     | No                | No                  | 0                     | 0                   |
| 482.1      | Pneumonia                                                                     | No                | No                  | 0                     | 0                   |
| 482.2      | Pneumonia                                                                     | No                | No                  | 0                     | 0                   |
| 482.32     | Pneumonia                                                                     | No                | No                  | 0                     | 0                   |
| 482.39     | Pneumonia                                                                     | No                | No                  | 0                     | 0                   |
| 482.40     | Pneumonia                                                                     | No                | No                  | 0                     | 0                   |
| 482.41     | Pneumonia                                                                     | No                | No                  | 0                     | 0                   |
| 482.42     | Pneumonia                                                                     | No                | No                  | 0                     | 0                   |
| 482.49     | Pneumonia                                                                     | No                | No                  | 0                     | 0                   |
| 482.82     | Pneumonia                                                                     | No                | No                  | 0                     | 0                   |
| 482.83     | Pneumonia                                                                     | No                | No                  | 0                     | 0                   |
| 482.9      | Pneumonia                                                                     | No                | Yes                 | 0                     | 1                   |
| 483.0      | Pneumonia                                                                     | No                | No                  | 0                     | 0                   |
| 483.1      | Pneumonia                                                                     | No                | No                  | 0                     | 0                   |
| 483.8      | Pneumonia                                                                     | No                | No                  | 0                     | 0                   |
| 484.7      | Pneumonia                                                                     | No                | No                  | 0                     | 0                   |
| 485        | Pneumonia                                                                     | No                | No                  | 0                     | 0                   |
| 487.0      | Pneumonia                                                                     | No                | No                  | 0                     | 0                   |
| 487.1      | Pneumonia                                                                     | No                | No                  | 0                     | 0                   |
| 487.1      | Bronchitis                                                                    | No                | No                  | 0                     | 0                   |
| 491.0      | Bronchitis                                                                    | No                | No                  | 0                     | 0                   |
| 491.1      | Bronchitis                                                                    | No                | No                  | 0                     | 0                   |
| 491.8      | Bronchitis                                                                    | No                | No                  | 0                     | 0                   |
| 491.9      | Bronchitis                                                                    | No                | No                  | 0                     | 0                   |

| ICD-9 code | Diagnosis                                                                                    | Phase I symptoms* | Phase II expansion† | No. initial symptoms‡ | No. total symptoms§ |
|------------|----------------------------------------------------------------------------------------------|-------------------|---------------------|-----------------------|---------------------|
| 493.92     | Unspecified asthma with (acute) exacerbation                                                 | No                | Yes                 | 0                     | 1                   |
| 514        | Pneumonia                                                                                    | No                | No                  | 0                     | 0                   |
| 695.11     | Other erythema multiforme                                                                    | No                | Yes                 | 0                     | 1                   |
| 708.0      | Allergic urticaria                                                                           | No                | Yes                 | 0                     | 1                   |
| 719.45     | Pain in unspecified hip                                                                      | No                | Yes                 | 0                     | 2                   |
| 724.1      | Pain in thoracic spine                                                                       | No                | Yes                 | 0                     | 1                   |
| 729.89     | Other symptoms and signs involving the musculoskeletal system                                | No                | Yes                 | 0                     | 1                   |
| 780.64     | Chills (without fever)                                                                       | No                | Yes                 | 0                     | 1                   |
| 780.8      | Generalized hyperhidrosis                                                                    | Yes               | Yes                 | 0                     | 2                   |
| 780.96     | Pain, unspecified                                                                            | Yes               | No                  | 0                     | 0                   |
| 784.2      | Localized swelling, mass and lump, head                                                      | No                | Yes                 | 0                     | 1                   |
| 786.02     | Orthopnea                                                                                    | No                | Yes                 | 0                     | 1                   |
| 786.30     | Hemoptysis, unspecified                                                                      | Yes               | Yes                 | 0                     | 1                   |
| 786.6      | Localized swelling, mass and lump, trunk                                                     | No                | Yes                 | 0                     | 6                   |
| 786.9      | Other abnormalities of breathing                                                             | No                | Yes                 | 0                     | 1                   |
| 793.11     | Nonspecific abnormal findings on radiological/other examination of solitary pulmonary nodule | Yes               | Yes                 | 0                     | 6                   |
| 793.19     | Other nonspecific abnormal finding of lung field                                             | No                | Yes                 | 0                     | 10                  |
| 796.4      | Other general symptoms and signs                                                             | No                | Yes                 | 0                     | 2                   |
| 807.00     | Closed fracture, unspecified rib(s)                                                          | Yes               | No                  | 0                     | 0                   |
| 829.0      | Fracture of unspecified bones, closed                                                        | Yes               | No                  | 0                     | 0                   |

\*These ICD-9 codes originated from the Phase I chart review. These are subject to the study design and conditions therein.

†Expanded Phase II symptoms are based on 6-month diagnosis history, before the diagnosis dates for coccidioidomycosis. These were determined to be similar to the Phase I symptoms by the review process described in the article. Thus, they are dependent on the results of the Phase I study, but served to provide a wider array of ICD-9 codes to capture the Phase I concepts.

‡Includes the ICD-9 codes that were found on the earliest symptom date for the population, 6 months before the date of diagnosis for coccidioidomycosis. The earliest symptom date was used to calculate the diagnosis delay in conjunction with the diagnosis date. It is possible for 1 patient to have multiple symptoms on a day, which would increase the total aggregate of these values.

§Total number of symptom diagnoses 6 months before coccidioidomycosis diagnosis dates for the population. Only a fraction of these served as the initial symptom.

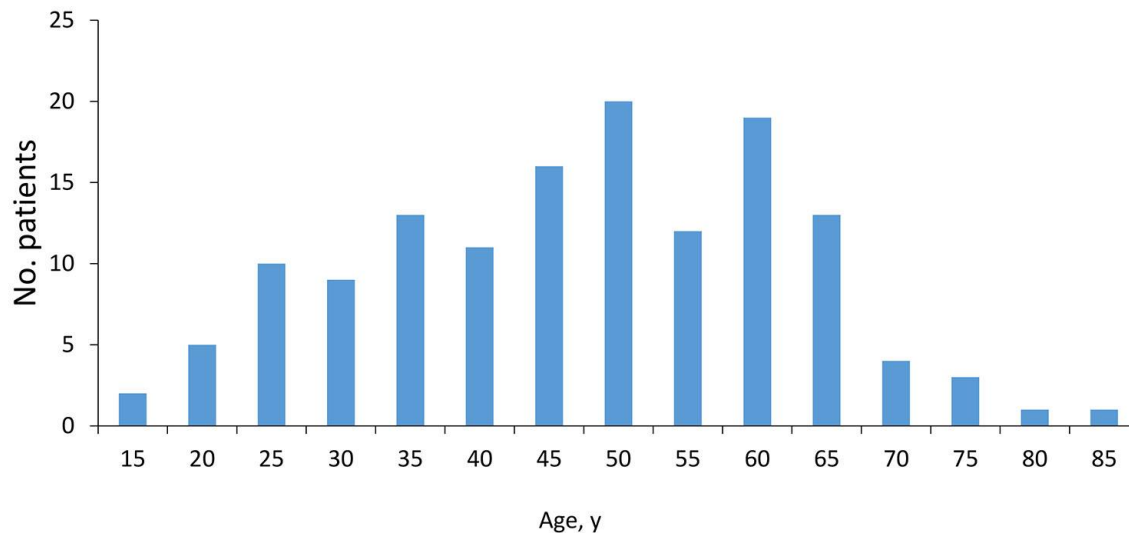

**Appendix Figure 1.** Age distribution of the population of a study of delayed coccidioidomycosis diagnosis, Arizona, USA.

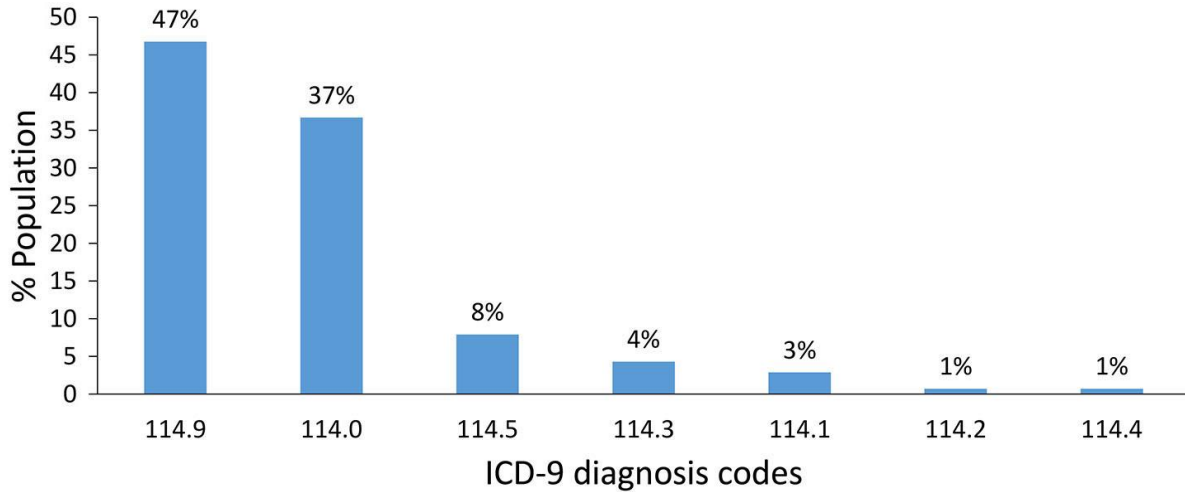

**Appendix Figure 2.** Distribution of diagnosis codes used to identify date of coccidioidomycosis diagnosis in patients in Arizona, USA.

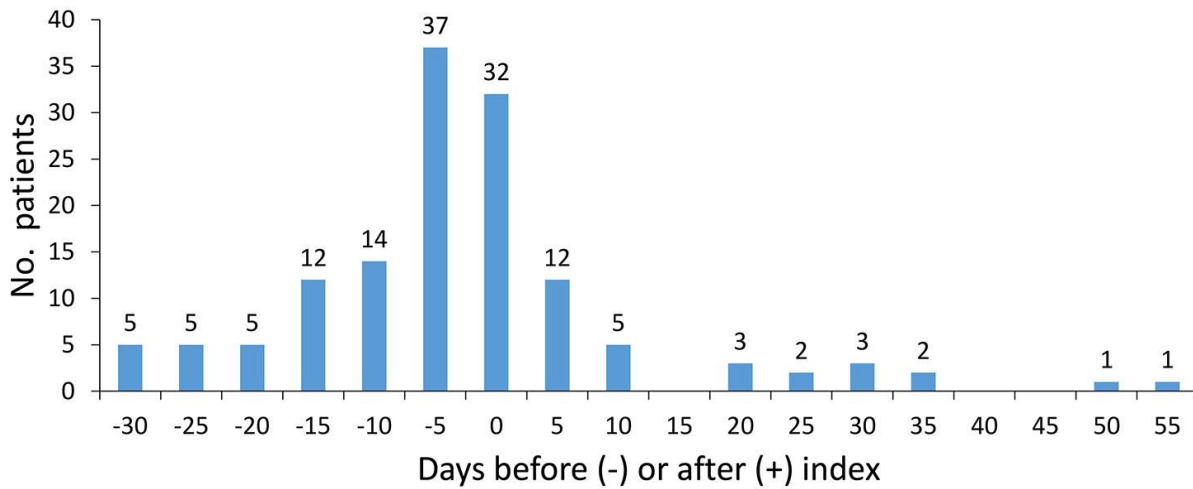

**Appendix Figure 3.** The time difference in days between the serology confirmation date and date of coccidioidomycosis diagnosis (index date), Arizona, USA.

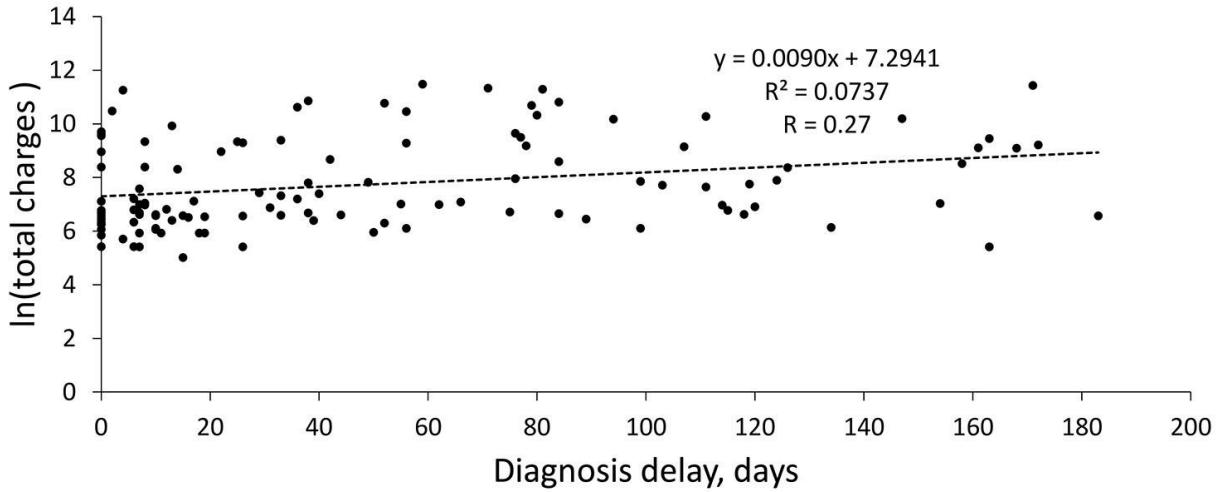

**Appendix Figure 4.** Linear regression model, assuming normality, for diagnosis delay vs. the lognormal (ln) of total healthcare charges for patients with coccidioidomycosis diagnosis, Arizona, USA. Only overall total charges are shown. The dashed line represents the fitted linear regression model.

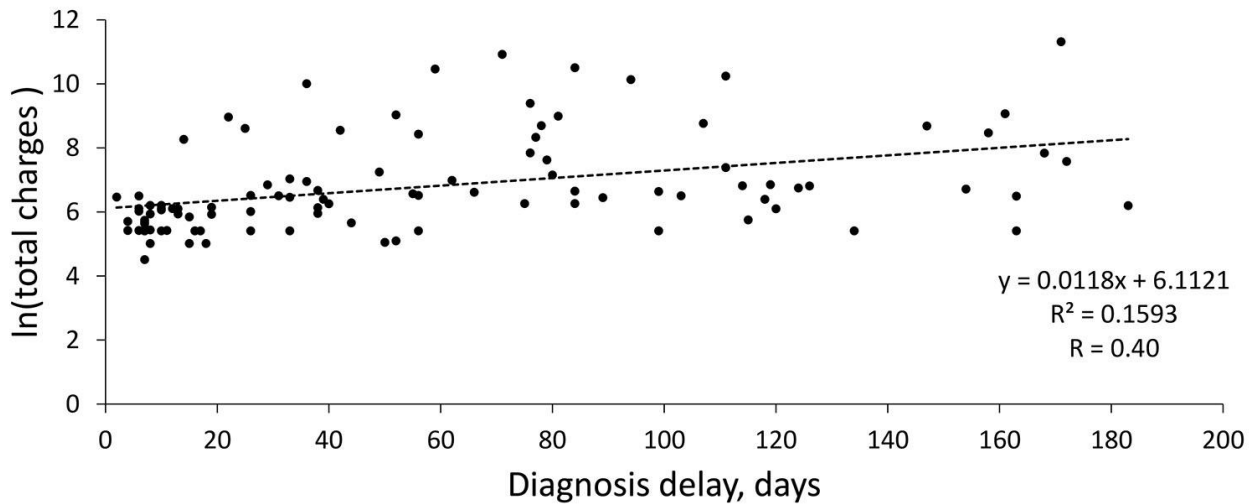

**Appendix Figure 5.** Linear regression model, assuming normality, for diagnosis delay vs. the lognormal (ln) of total healthcare charges for patients with coccidioidomycosis diagnosis, Arizona, USA. Only total charges before coccidioidomycosis diagnosis are shown. The dashed line represents the fitted linear regression model.

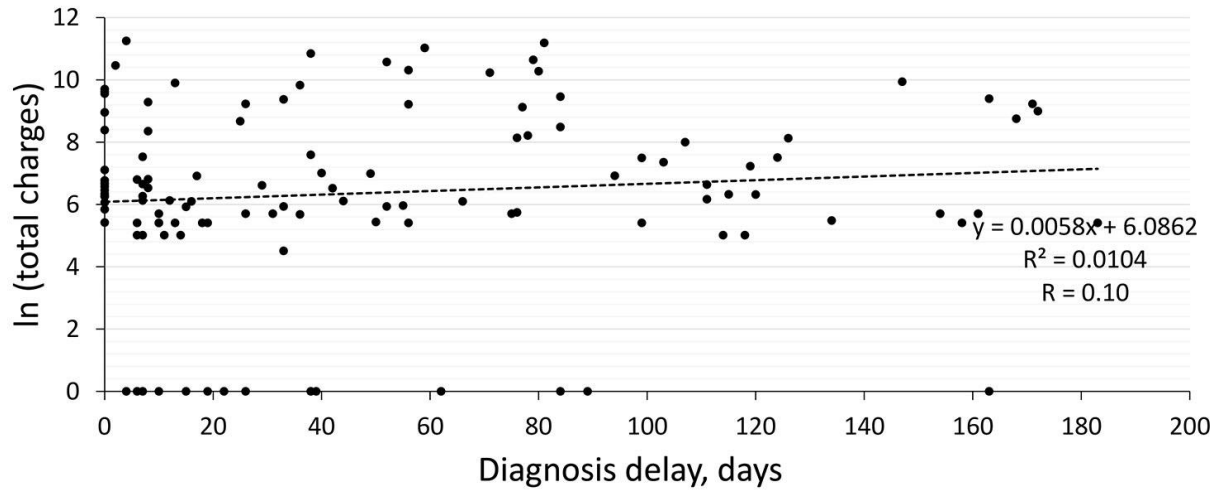

**Appendix Figure 6.** Linear regression model, assuming normality, for the diagnosis delay vs. the lognormal (ln) of total healthcare charges for patients with coccidioidomycosis diagnosis, Arizona, USA. Only total charges on or after CM diagnosis are shown. The dashed line represents the fitted linear regression model.
